# Supplementary material
Source: MDPI journal article supplement (https://www.mdpi.com/2073-4441/12/4/1031)
Supplement: s1 [file s1]

## Supporting Information

# Concentrations and Loads of Dissolved and Particulate Organic Carbon in Urban Stormwater Runoff

Stefan Kaley<sup>1,2</sup> and Gurpal S. Toor<sup>3,\*</sup>

<sup>1</sup> Former Soil and Water Quality Laboratory, Gulf Coast Research and Education Center, University of Florida, Wimauma, FL 33598, USA

<sup>2</sup> Current address: Charlotte County Community Development Department, Port Charlotte, FL 33948, USA; stefan.kaley@charlottecountyfl.gov

<sup>3</sup> Department of Environmental Science and Technology, University of Maryland, College Park, MD 20742, USA

\* Correspondence: gstoor@umd.edu

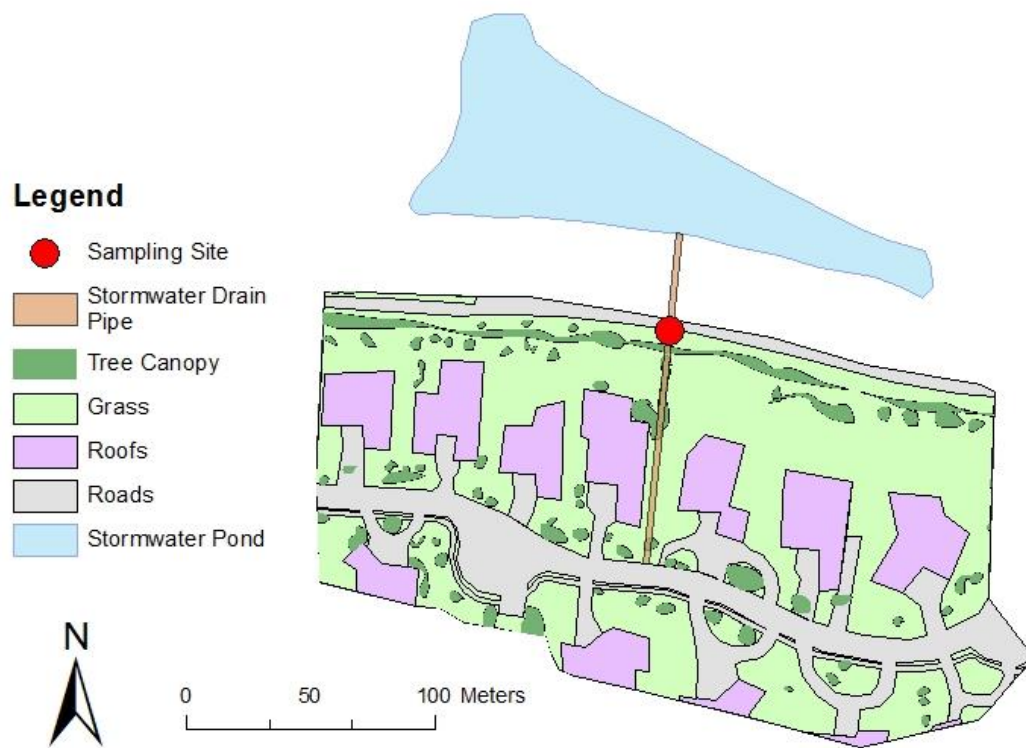

**S1 Figure. Detailed land use of residential catchment in Manatee County, Florida, United States. The location map of the catchment was made by using ArcGIS 10.3.1 version.**

(A)

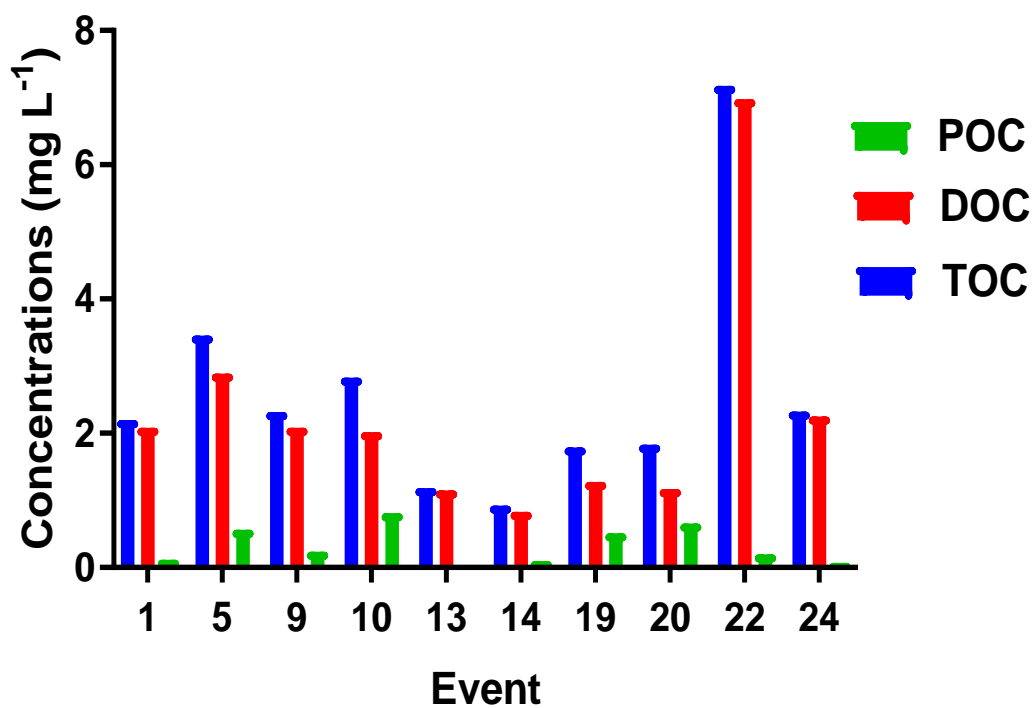

S2 Figure. Concentrations of TOC, DOC, and POC in rainfall samples collected in 10 storm events from May to September, 2016.

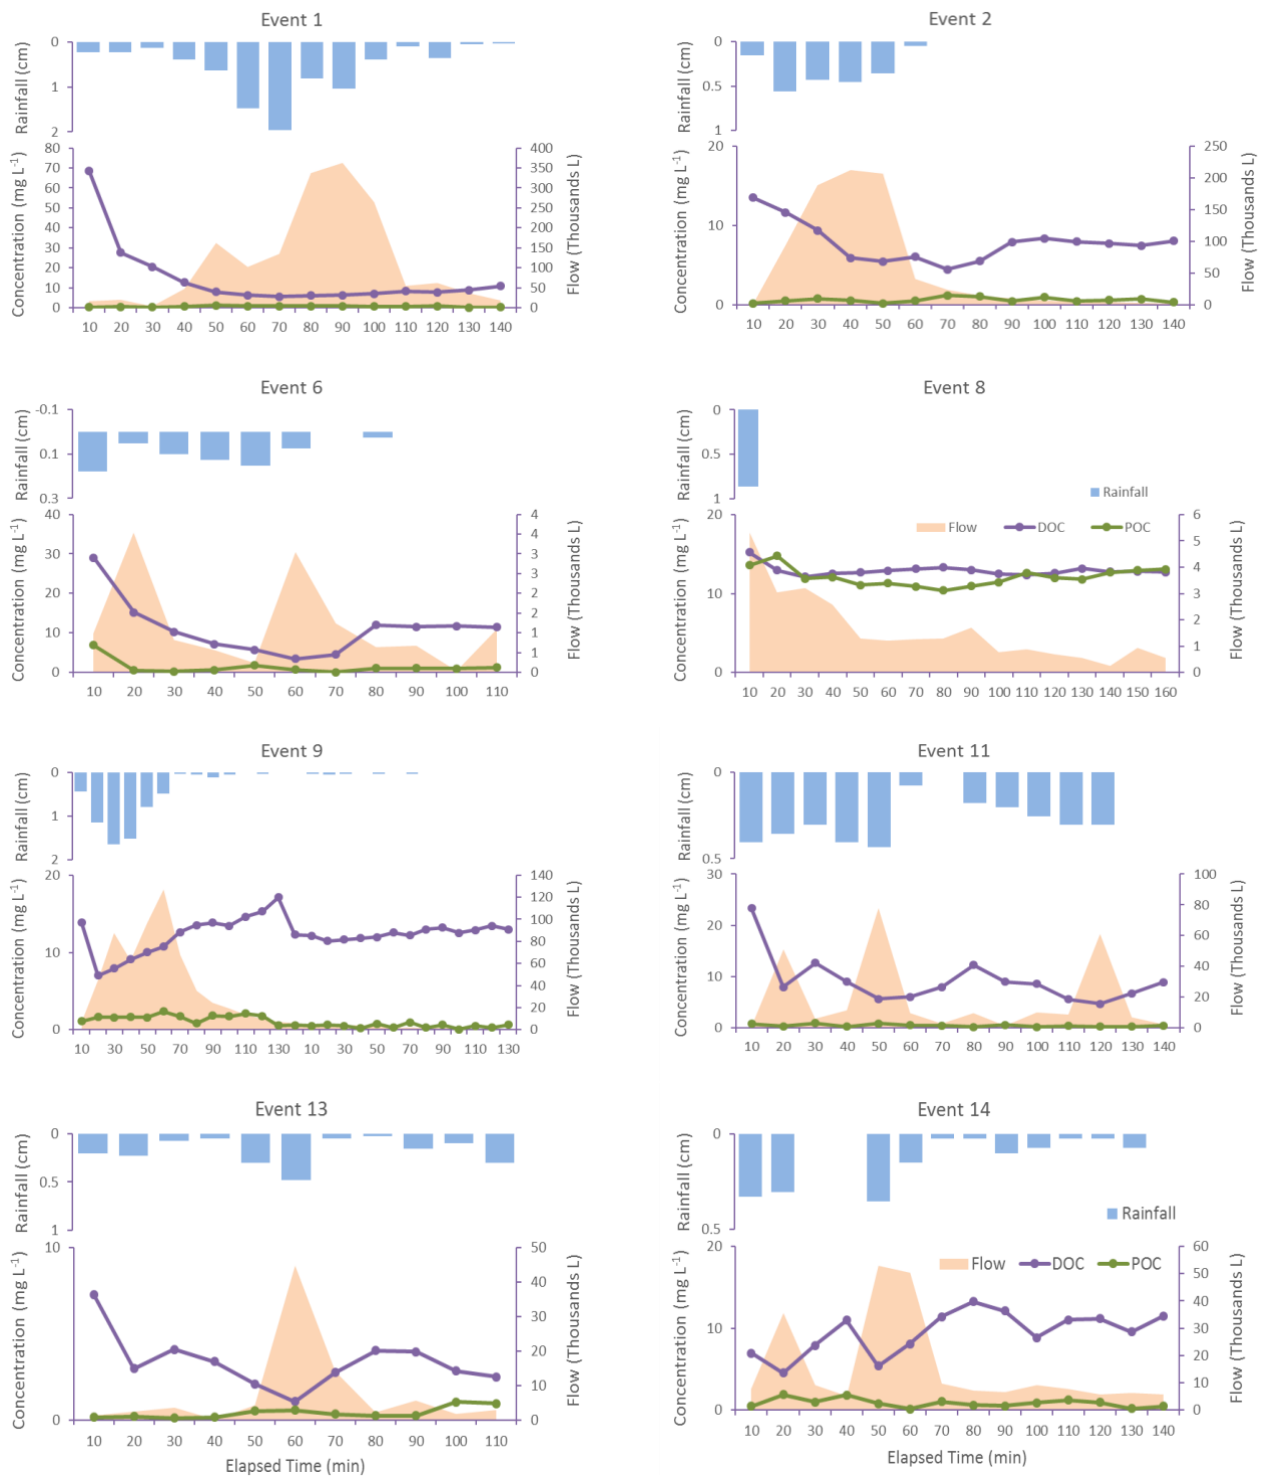

**S3 Figure. Temporal relationship among DOC, POC, flow, and rainfall during the longest eight storm events between June to September. The primary y-axis displays DOC and POC concentrations in stormwater runoff, the secondary y-axis displays daily flow, the primary x-axis displays the duration of the event, and the secondary x-axis displays rainfall.**

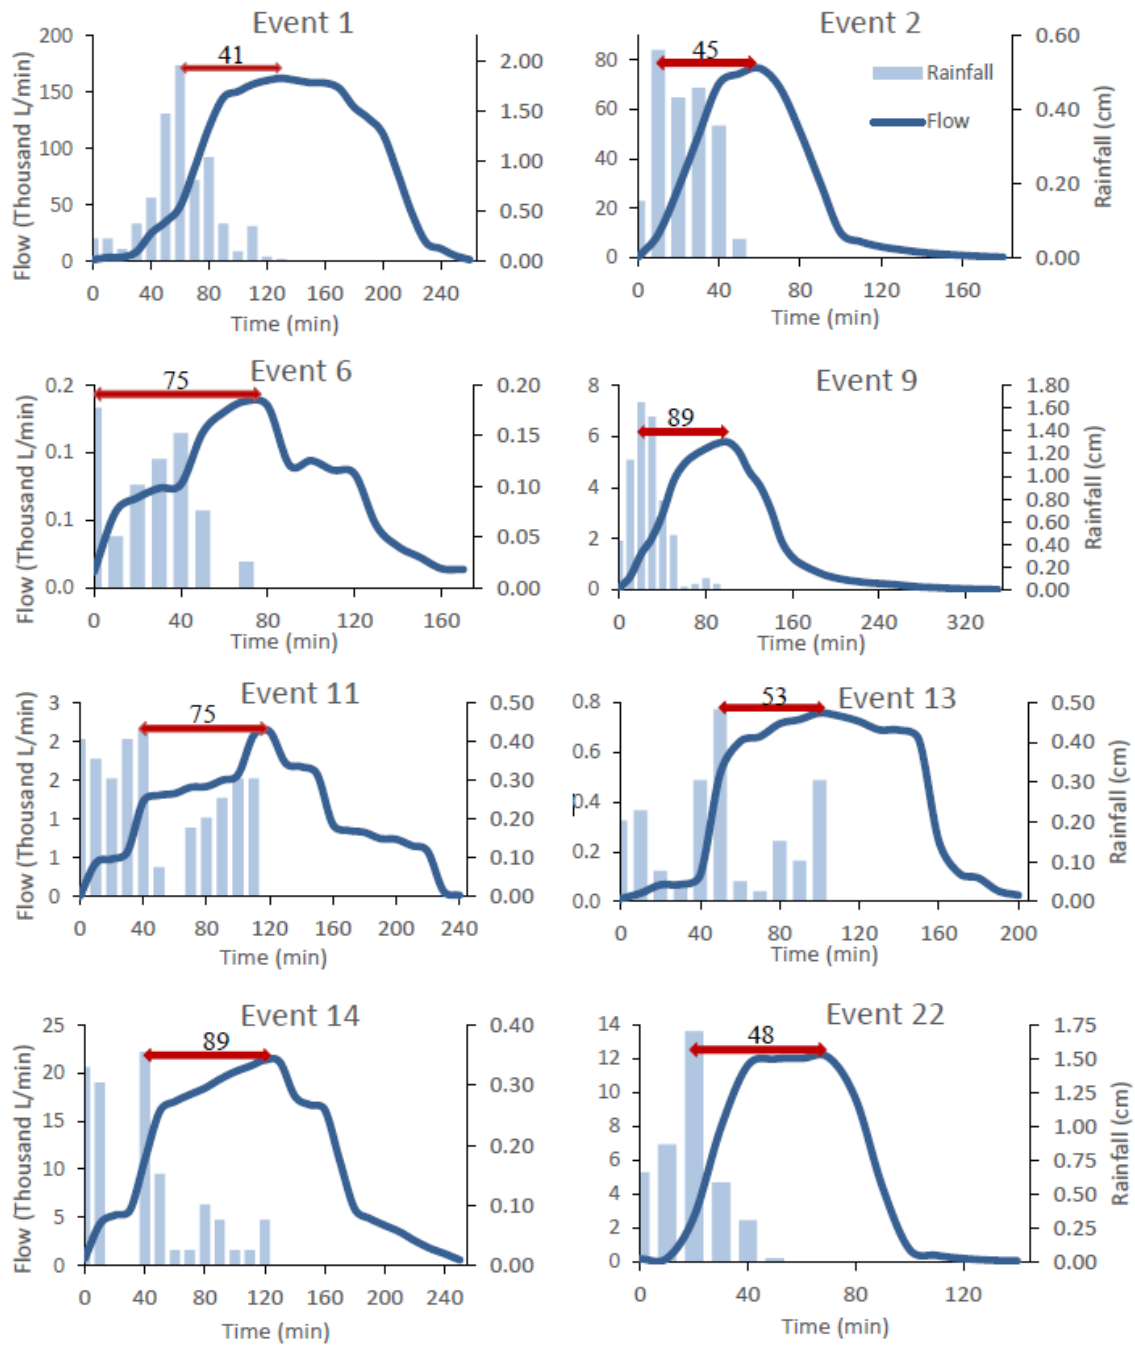

**S4 Figure. Stormwater hydrographs for the eight longest storm events during the 2016 wet season. Red arrow shows the hydrograph lag time in minutes.**

**Table S1. Pervious and impervious areas in the residential catchment.**

| Land use                                          | Area |                 |
|---------------------------------------------------|------|-----------------|
|                                                   | ha   | % of total area |
| Green space (Tree canopy)                         | 0.24 | 6.2             |
| Lawn (Turfgrass)                                  | 1.98 | 50.9            |
| Single-family homes (rooftops, patios, driveways) | 0.72 | 18.5            |
| Roads and sidewalks                               | 0.95 | 24.4            |
| Pond                                              | 0.85 | —               |
| Total pervious area (tree canopy, grass)          | 2.22 | 57.1            |
| Total impervious area (roofs, roads)              | 1.67 | 42.9            |
| Total area                                        | 3.89 | 100.0           |

**Table S2. Rainfall and flow characteristics in 25 storm events during the 2016 wet season.**

|            | <b>Rainfall<br/>Amount<br/>(cm)</b> | <b>Rainfall<br/>Intensity<br/>(cm/h)</b> | <b>Event<br/>Duration<br/>(min)</b> | <b>Flow<br/>Amount<br/>(m<sup>3</sup>)</b> |
|------------|-------------------------------------|------------------------------------------|-------------------------------------|--------------------------------------------|
| Total      | 44.1                                | —                                        | —                                   | 6,684.89                                   |
| Mean       | —                                   | 0.18                                     | 118                                 | 267.40                                     |
| Minimum    | 0.08                                | 0.01                                     | 10                                  | 1.39                                       |
| Maximum    | 7.80                                | 2.92                                     | 160                                 | 639.05                                     |
| Wet Season | 105.1                               | —                                        | —                                   | 21,540.03                                  |

**Table S3. Concentrations of DOC in stormwater runoff in this study and previous studies from Florida, United States.**

| Type of Flow/<br>Water body     | Land Use                                    | Location       | DOC Mean<br>Concentration (mg L <sup>-1</sup> ) | Drainage<br>Area (km <sup>2</sup> ) | Citation                 |
|---------------------------------|---------------------------------------------|----------------|-------------------------------------------------|-------------------------------------|--------------------------|
| <i>Stormwater runoff</i>        | <i>Urban<br/>Residential<br/>Catchments</i> | <i>FL, USA</i> | 10.5                                            | 0.04                                | <i>This study</i>        |
| Alafia River, FL                | River<br>watershed                          | FL, USA        | 5.0                                             | —                                   | Chen et al.<br>[35]      |
| Apalachicola                    | River<br>Watershed                          | FL, USA        | 6                                               | 49,728                              | Tian et al. [28]         |
| Canal C-111 at S-<br>177, FL    | Canal                                       | FL, USA        | 6.6                                             | —                                   | McPherson et<br>al. [34] |
| Tamiami Canal,<br>FL            | Canal                                       | FL, USA        | 9.5                                             | —                                   | McPherson et<br>al. [34] |
| Peace River<br>Arcadia, FL      | River<br>watershed                          | FL, USA        | 15.0                                            | —                                   | McPherson et<br>al. [34] |
| Kissimmee River<br>at S-65E, FL | River<br>watershed                          | FL, USA        | 16.0                                            | —                                   | McPherson et<br>al. [34] |
| Caloosahatchee<br>River, FL     | River<br>watershed                          | FL, USA        | 16.0                                            | —                                   | McPherson et<br>al. [34] |
| Hillsboro Canal at<br>S-6, F    | Canal                                       | FL, USA        | 34.0                                            | —                                   | McPherson et<br>al. [34] |
